## Potential options for managing LOX+ ER– breast cancer patients

Yong Han<sup>1,\*</sup>, Shenyi Lian<sup>2,\*</sup>, Xingran Cui<sup>3</sup>, Kexin Meng<sup>4</sup>, Balázs Győrffy<sup>5,6</sup>, Tao Jin<sup>7</sup>, Dongsheng Huang<sup>1</sup>

<sup>1</sup>Clinical Research Institute, Zhejiang Provincial People's Hospital, Hangzhou, China

<sup>2</sup>Key Laboratory of Carcinogenesis and Translational Research (Ministry of Education), Department of Biochemistry and Molecular Biology, Peking University Cancer Hospital and Institute, Beijing, China

<sup>3</sup>Division of Interdisciplinary Medicine and Biotechnology, Department of Medicine, Beth Israel Deaconess Medical Center/Harvard Medical School, Boston, Massachusetts, USA

<sup>4</sup>Department of Thyroid Breast Surgery, Zhejiang Provincial People's Hospital, Hangzhou, China

<sup>5</sup>Momentum Cancer Biomarker Research Group, Research Centre for Natural Sciences, Hungarian Academy of Sciences, Budapest, Hungary

<sup>6</sup>Second Department of Pediatrics, Semmelweis University, Budapest, Hungary

<sup>7</sup>Department of Cardiothoracic Surgery, Zhejiang Provincial People's Hospital, Hangzhou, China

\*These authors contributed equally to this work

**Correspondence to:** Tao Jin, **e-mail:** onlune@126.com  
Dongsheng Huang, **e-mail:** dshuangzry@gmail.com

**Keywords:** LOX, estrogen receptor, EMT, chemoresistance, bisphosphonates

**Received:** September 01, 2015

**Accepted:** April 11, 2016

**Published:** April 28, 2016

### ABSTRACT

**Overexpression of lysyl oxidase (LOX) is often observed in estrogen receptor negative (ER–) breast cancer patients with bone metastasis. In the present bioinformatics study, we observed that LOX is a prognostic factor for poor progression free survival in patients with ER– breast cancer. LOX overexpression was positively correlated with resistance to radiation, doxorubin and mitoxantrone, but negatively correlated with resistance to bisphosphonate, PARP1 inhibitors, cisplatin, trabectedin and gemcitabine. LOX overexpression was also associated with EMT and stemness of cancer cells, which leads to chemotherapeutic resistance and poor outcome in ER– patients. Although we suggest several therapeutic interventions that may help in the management of LOX+ ER– breast cancer patients, experiments to validate the function of LOX in ER– breast cancer are still needed.**

### INTRODUCTION

Breast cancers in which the tumor is estrogen receptor (ER)-negative (ER–) account for approximately 30% of white patients [1] and about 40%–50% of Chinese patients [2]. These patients tend to have a poorer prognosis with a higher risk of disease recurrence and metastasis than patients with ER+ tumors. This is in part because there are fewer effective methods for preventing and treating ER– breast cancers. In addition, the molecular subtypes of ER– tumors are not well defined due to their biological heterogeneity. In recent years, however, a number of potential signaling pathways driving ER– breast cancer have been identified [3, 4]. This makes targeted therapy focusing on a specific molecular subtype a potentially effective strategy for managing ER– breast cancer patients. That said, the clinical application of such new approaches remains a prospect for the future.

Lysyl oxidase (LOX) is an enzyme involved in regulating extracellular matrix (ECM) and connective tissue homeostasis [5]. Moreover, previous studies have shown that LOX plays a crucial role in mediating proliferation, migration, and invasion by endometrial and endometriotic cells. Specifically, LOX influences the expression of genes related to fibrosis and ECM remodeling, including E-cadherin [6], which is indicative of its pro-metastatic potential. A recent study by Thomas et al. [7] showed that LOX induces pre-metastatic bone lesions in breast cancer patients (especially ER– subgroup) by disrupting normal bone homeostasis. These lesions subsequently facilitate colonization by circulating tumor cells (CTCs), leading to bone metastasis. The authors of that report suggest administration of bisphosphonate to breast cancer patients with LOX overexpression may prevent establishment and proliferation of CTCs within bone. Nevertheless, the molecular mechanisms underlying

LOX-promoted ER<sup>-</sup> breast cancer metastasis and the best approach to treating LOX<sup>+</sup> ER<sup>-</sup> breast cancer patients remains unknown.

To promote translational research on LOX towards greater clinical significance, in this study, we address the following questions: how is LOX associated with metastasis and estrogen receptor 1 (ESR1) expression; why does bisphosphonate inhibit metastasis in patients overexpressing LOX; and are there any promising therapeutic options for managing LOX<sup>+</sup> ER<sup>-</sup> breast cancer patients.

## RESULTS

### LOX overexpression is associated with poor PFS and metastasis

LOX overexpression is reported to be specifically associated with bone relapse in ER<sup>-</sup> breast cancer patients [7]. In the present study, we analyzed the Gyorffy dataset to explore the relation between LOX and progression free survival (PFS) in breast cancer patients. We found that LOX is associated with PFS among all patients (Figure 1A,  $P < 0.0001$ ) and ER<sup>-</sup> patients (Figure 1B,  $P = 0.0009$ ), but not ER<sup>+</sup> patients (Figure 1C,  $P > 0.05$ ). Furthermore, the results of gene set enrichment analysis (GSEA) indicate that LOX expression correlates positively with gene sets that represent cancer cell migration and metastasis in breast cancer (Figure 1D,  $P < 0.0001$ ). GSEA also revealed that LOX expression correlates negatively with the ESR1 gene signature (Figure 2A,  $P = 0.008$ ) and that LOX expression is significantly higher in ESR1-low than ESR1-high patients (Figure 2B). These results indicate that LOX is a strong predictor of poor PFS in ER<sup>-</sup> breast cancer patients and is closely associated with metastasis.

### Bisphosphonate is a therapeutic option for LOX<sup>+</sup> breast cancer patients

Bisphosphonate treatment may suppress bone metastasis in ER<sup>-</sup> breast cancer patients overexpressing LOX [7]. To explore the underlying mechanism, we reanalyzed breast cancer data from The Cancer Genome Atlas, which revealed that LOX expression correlates with expression of matrix metalloproteinase 2 (MMP2) (Figure 3A,  $R^2 = 0.47$ ), collagen type I alpha1 (COL1A1) (Figure 3B,  $R^2 = 0.47$ ), and secreted protein acidic and rich in cysteine (SPARC) (Figure 3C,  $R^2 = 0.51$ ). Given that MMP2, COL1A1 and SPARC are all pro-metastatic genes [8–10], we suggest these genes play crucial roles in LOX<sup>+</sup> breast cancer metastasis. In addition, data mining results from The Comparative Toxicogenomics Database indicates that bisphosphonate down-regulates expression of LOX, MMP2, COL1A1 and SPARC, which means bisphosphonate may suppress cancer metastasis by targeting these four genes.

### Unfavorable characteristics correlated with LOX overexpression

We next sought to explore the mechanisms and characteristics underlying the LOX-associated poor PFS. GSEA results showed that LOX expression positively correlates with gene signatures that represent poor outcome after radiation therapy. This finding indicates that LOX<sup>+</sup> breast cancer patients are resistant to radiation therapy (Figure 4A and 4B). Similarly, it may not be a good choice for LOX<sup>+</sup> patients to choose doxorubicin (Figure 4C) or mitoxantrone (Figure 4D) for chemotherapy. Other analyses indicated that LOX overexpression correlates with epithelial-mesenchymal transition (EMT) (Figure 4E and 4F) and activation of cancer stem cell pathways, such as the WNT and HEDGEHOG pathways (Figure 4G–4I). Thus, resistance to radiation and certain drugs, EMT transition, and harboring cancer stem cell like characteristics may contribute to the LOX-related poor prognosis.

### Favorable characteristics correlated with LOX overexpression

Overexpression of LOX does present certain advantages. For instance, LOX expression correlates negatively with expression of genes associated with DNA repair (Figure 5A,  $P = 0.006$ ), but correlates positively with genes down-regulated in samples resistant to cisplatin, trabectedin and gemcitabine (Figure 5B–5D,  $P < 0.0001$ ,  $P < 0.0001$ ,  $P = 0.002$ , respectively). This indicates that cytotoxic drugs such as cisplatin and gemcitabine will likely achieve a better clinical response in patients overexpressing LOX. In addition, LOX expression is significantly higher among carriers of BRCA1 mutations than among those without BRCA1 mutation (Figure 6A), though LOX expression does not differ between BRCA2 mutation and wild type carriers (Figure 6B). Since poly (ADP-ribose) polymerase (PARP) inhibitors are effective for treatment of breast cancer patients with BRCA1 mutation [11], this class of drugs may also be effective for managing breast cancer patients who overexpress LOX and carry BRCA1 mutation.

### Appropriate therapeutic options for LOX<sup>+</sup> ER<sup>-</sup> breast cancer patients

Based on the analysis summarized above, the appropriate treatment options are illustrated in Figure 7. Briefly, radiation, doxorubicin and mitoxantrone would be ineffective in LOX<sup>+</sup> ER<sup>-</sup> patients. On the other hand, a PARP1 inhibitor, cisplatin, trabectedin and gemcitabine may produce promising results.

## DISCUSSION

The ER<sup>-</sup> breast cancer subtype is associated with a significantly higher 5-year recurrence rate and fewer effective treatment strategies than is the ER<sup>+</sup> subtype [12]. The outcomes of treatments aimed at suppressing key signaling pathways are far from satisfying due to the heterogeneity of ER<sup>-</sup> tumors [13]. At present, much effort is focused on the molecular subtyping of ER<sup>-</sup> breast cancers [3, 4]. For example, molecular markers such as mTOR and Src are reportedly involved in the development of ER<sup>-</sup> tumor metastasis [14].

Although strong evidence indicates LOX promotes bone metastasis in patients with breast cancer [7], the association between LOX and prognosis in ER<sup>-</sup> breast cancer patients remained unclear. We address that issue in the present study and show the significant prognostic power of LOX in ER<sup>-</sup> breast cancer. Given that survival is usually poor among patients with high LOX expression, LOX could be a useful biomarker to stratify patients with ER<sup>-</sup> breast cancer and direct personalized therapies.

Bisphosphonates are common medications used to treat osteoporosis and may suppress bone metastasis by inhibiting LOX [7], [15]. Moreover, our analysis

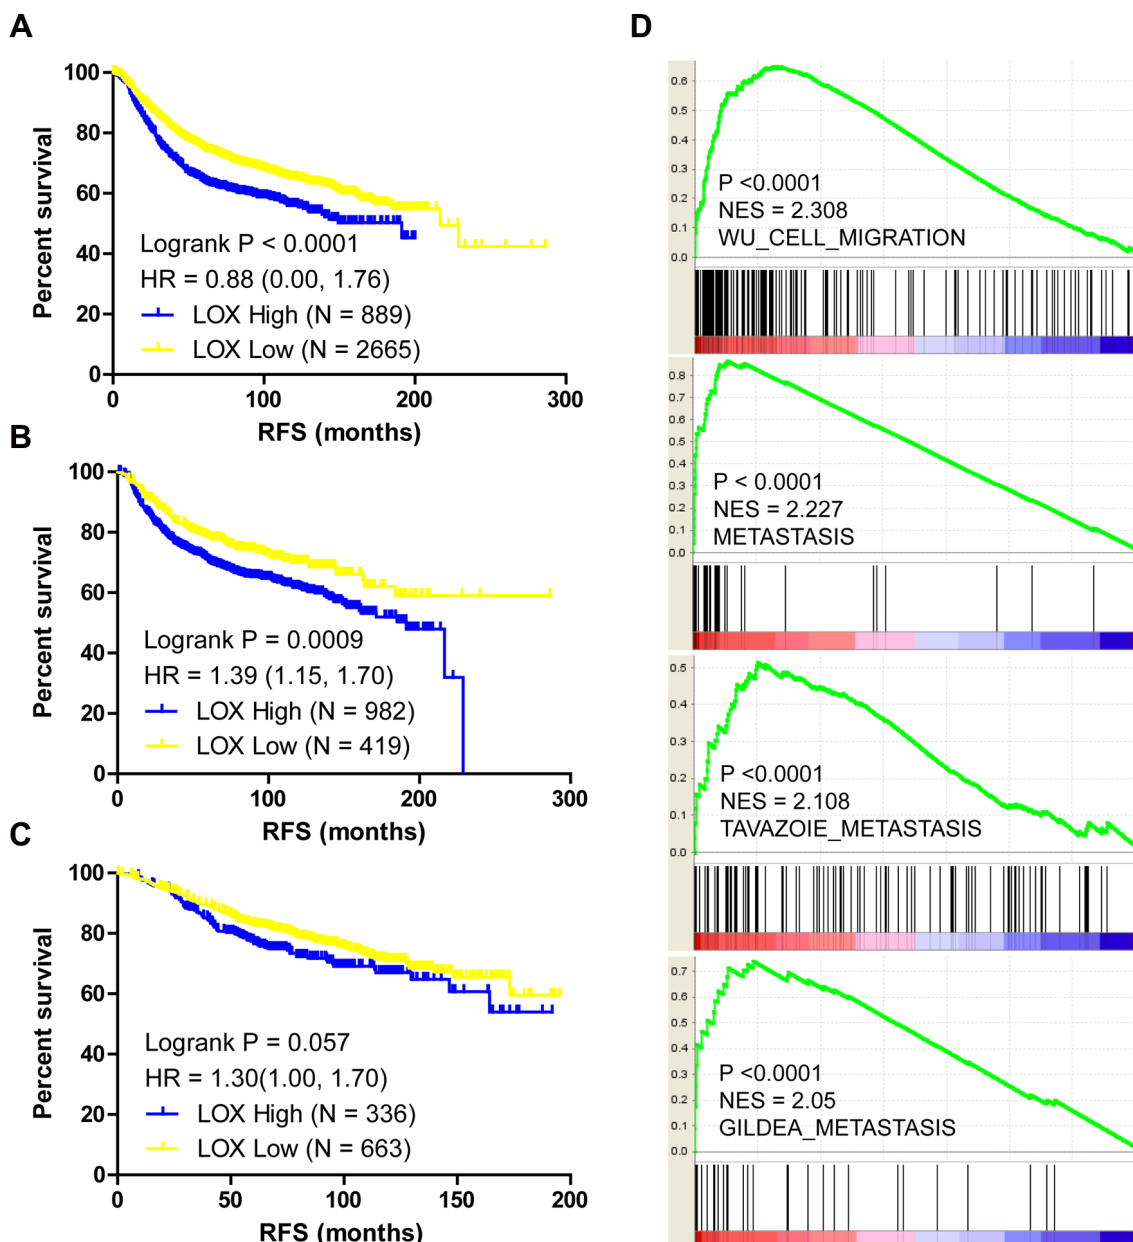

**Figure 1: LOX expression correlates with PFS and metastasis in breast cancer patients.** LOX expression correlates negatively with the PFS among all breast cancer patients (A) and among ER<sup>-</sup> breast cancer patients (B). (C) There is no significant correlation between LOX expression and PFS among ER<sup>+</sup> breast cancer patients. (D) GSEA analysis indicating that LOX expression correlates positively with migration and metastasis.

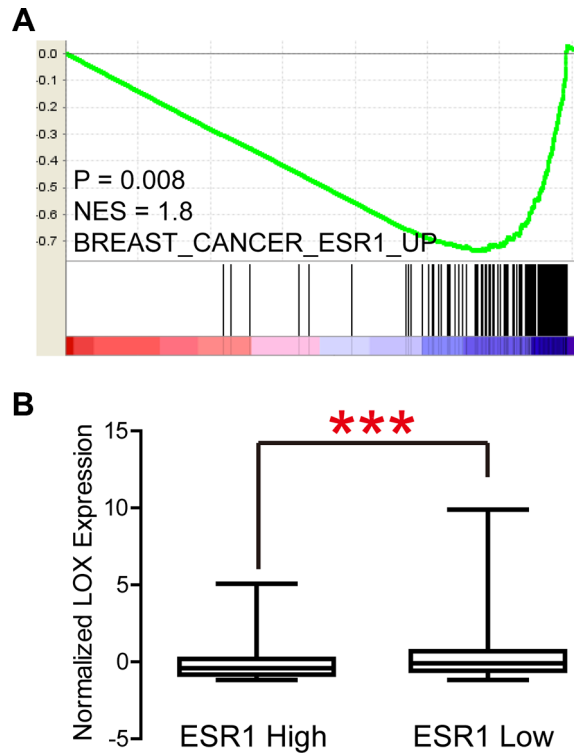

**Figure 2:** LOX expression correlates negatively with ESR1 signatures (A) and ESR1 expression (B).

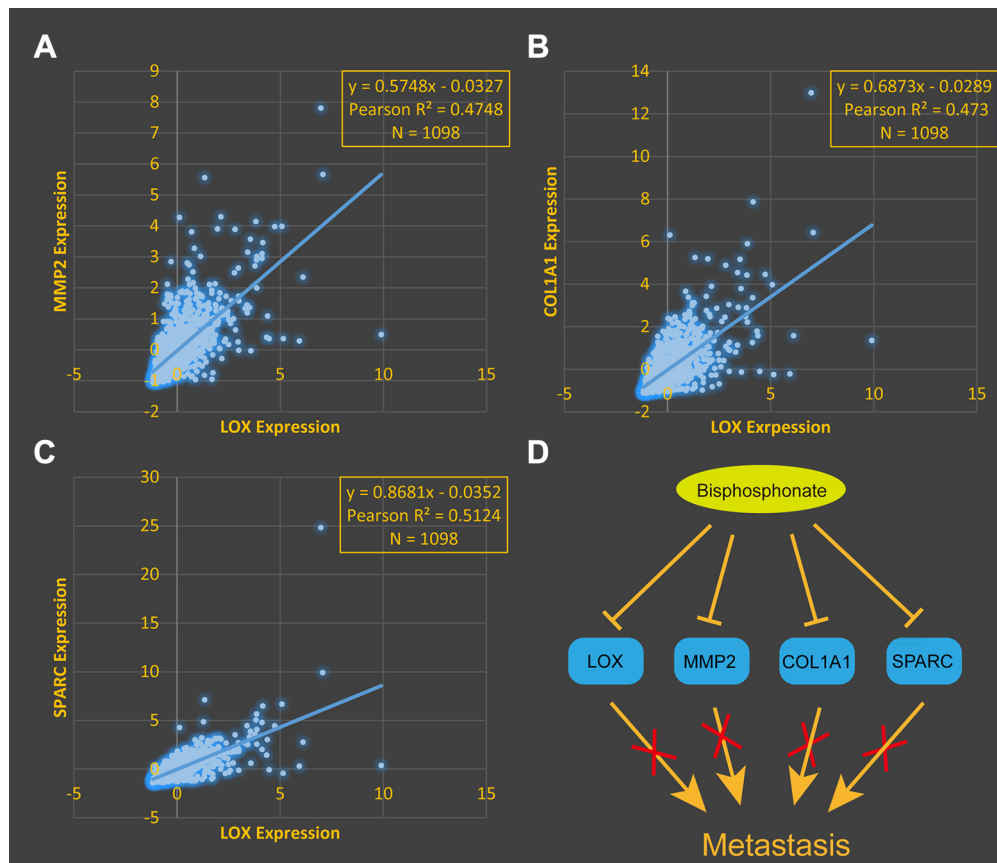

**Figure 3:** LOX expression correlates positively expression of MMP2 (A), COL1A1 (B) and SPARC (C). (D) Diagram summarizing results indicating bisphosphonate suppresses metastasis by inhibiting LOX, MMP2, COL1A1 and SPARC expression.

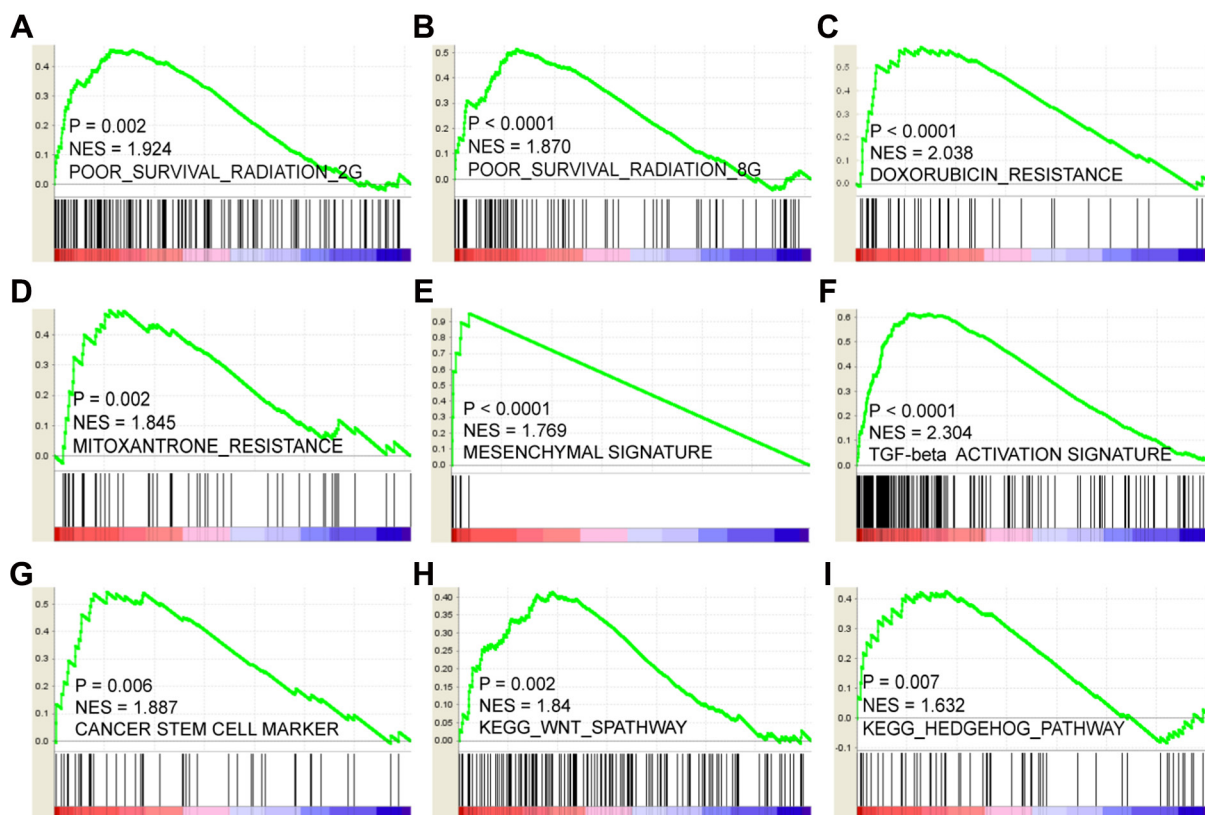

**Figure 4:** LOX correlates positively with resistance to radiation therapy (A and B), doxorubicin (C) and mitoxantrone (D). LOX expression also correlates with mesenchymal gene expression signature (E) and TGF- $\beta$  pathway activation (F). High levels of LOX expression correlates with overexpression of cancer stem cell markers (G) and activation of stem cell pathways such as the WNT (H) and HEDGEHOG (I) signaling pathways.

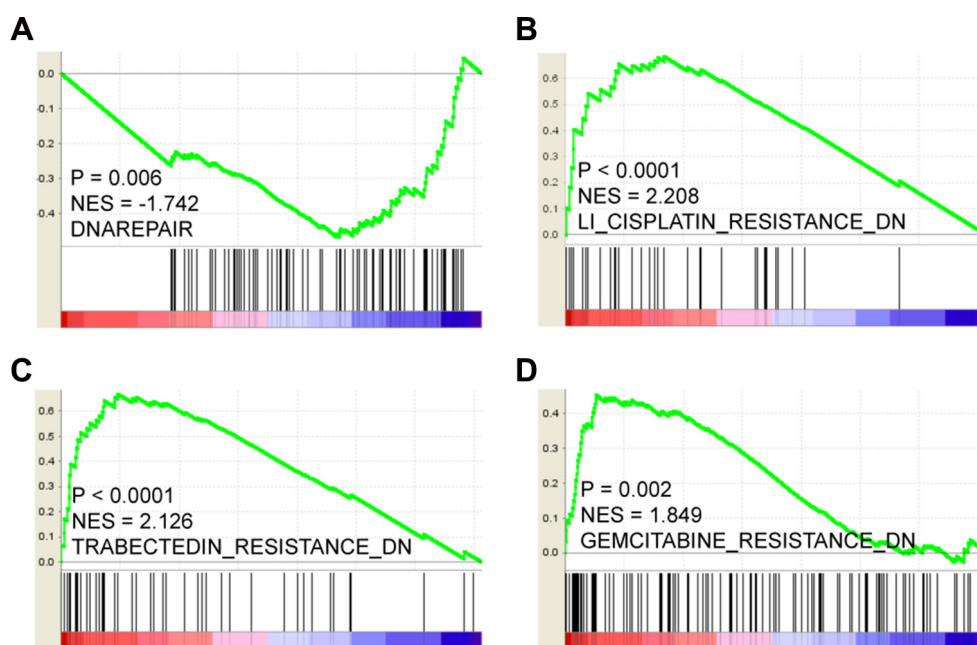

**Figure 5:** (A) LOX expression correlates negatively with DNA repair gene expression and with down-regulation of genes involved in cisplatin (B), trabectedin (C) and gemcitabine (D) resistance processes.

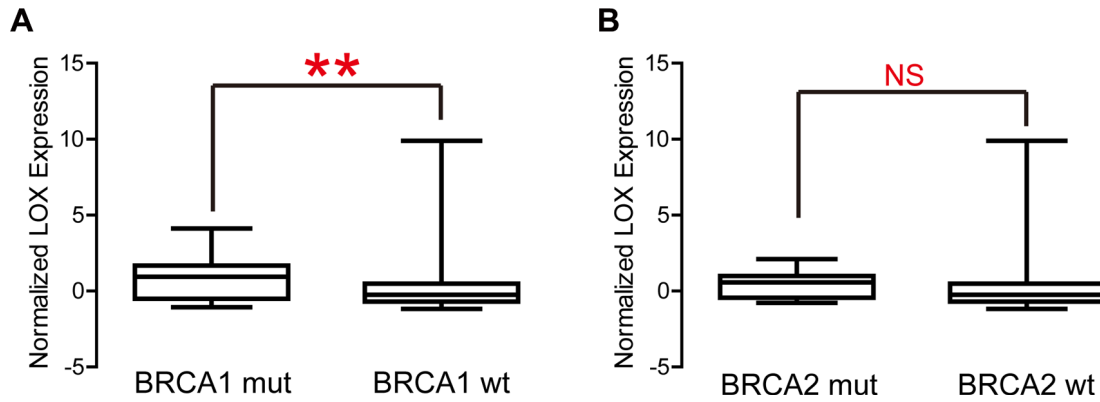

**Figure 6:** LOX expression is significantly higher in BRCA1 mutation carriers than the wild type group (A), whereas there is no difference between BRCA2 mutation carriers and the BRCA2 wild type group.

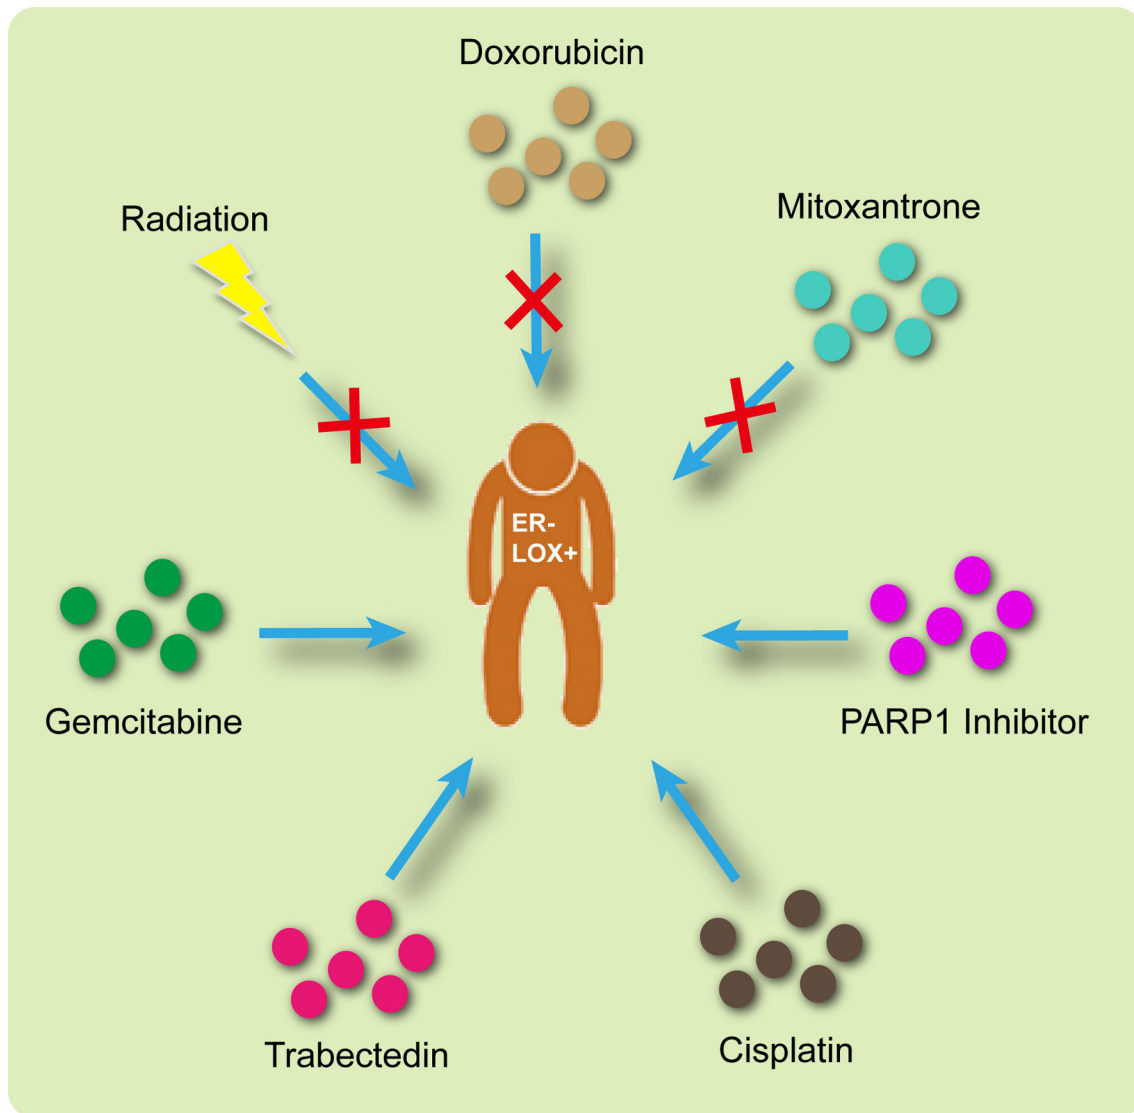

**Figure 7:** Appropriate therapeutic interventions for ER- LOX+ breast cancer patients.

indicates that LOX is likely co-expressed with MMP2, COL1A1 and SPARC, all of which contribute to initiating cancer metastasis and EMT [9, 10, 16–18], and that bisphosphonates inhibit MMP2 activity [19, 20], COL1A1-driven osteoporotic fracture [21] and SPARC-stimulated EMT [22, 23]. Bisphosphonates may also inhibit breast cancer progression by decreasing stromal TGF- $\beta$  excretion and inhibiting TGF- $\beta$  signaling in cancer cells [24]. Based on these findings, we suggest that bisphosphonates are potentially effective chemotherapeutics for treating LOX+ ER– breast cancer patients.

Gemcitabine and cisplatin are currently used in adjuvant settings for treatment of breast cancer. Hu et al. [25] showed cisplatin plus gemcitabine could be an alternative or even the preferred first-line therapeutic strategy for patients with metastatic triple-negative breast cancer. Since LOX expression positively correlates with cisplatin and gemcitabine sensitivity, LOX+ ER– breast cancer patients may show a higher response rate to these drugs.

Inhibition of PARP is an effective strategy for suppressing cancers with BRCA1 and BRCA2 mutations. There are currently several PARP inhibitors in clinical trials aimed at evaluating their efficacy for the management of BRCA-mutated breast cancers [11]. For instance, among patients with metastatic triple-negative breast cancer, the response rate was significantly higher among patients receiving chemotherapy plus iniparib (a PARP inhibitor) than among those receiving chemotherapy alone (56% vs. 34%,  $p = 0.01$ ) [26]. It was also reported that preoperative combined gemcitabine, carboplatin and iniparib is effective for management of early-stage triple-negative and BRCA1/2 mutation-associated breast cancer [27]. The correlation between LOX and BRCA mutation has never been reported before, but our analysis indicates that LOX expression correlates significantly with BRCA1 mutation. Since BRCA1 mutation carriers are sensitive to PARP inhibitors, some LOX+ ER– breast cancer patients may also benefit from PARP inhibitors.

In sum, our findings show that radiation, doxorubicin and mitoxantrone will be less effective in patients overexpressing LOX, but that PARP inhibitors, cisplatin, trabectedin and gemcitabine may yield positive effects. A limitation of this study is that all the data presented are based on bioinformatics analyses. Still needed are wet lab experiments and well-designed clinical trials before any clinical significance can be attributed.

## MATERIALS AND METHODS

### Ethics statement

For this study, only publicly available datasets were downloaded and reanalyzed. The Research Ethics Committee of Zhejiang Provincial People's Hospital therefore waived the requirement for ethical approval.

## Genomic analysis

The Gyorffy dataset [28] ( $N = 3554$ ) was used for survival analysis. Gene-Drug interaction data was downloaded from The Comparative Toxicogenomics Database [29] GSEA [30] and all other association analyses were performed using breast cancer data (level 3,  $N = 532$ ) from The Cancer Genome Atlas (National Cancer Institute cancer genome atlas data portal. <http://tcga-data.nci.nih.gov/tcga/findArchives.htm>. Accessed September 1, 2014).

## Statistical analysis

All the data were analyzed using standard statistical tests, including independent samples  $t$ -tests, log rank tests and Fisher's exact tests. Values of  $P < 0.05$  were considered significant. R 3.2.1 (R Foundation for Statistical Computing [<http://www.r-project.org/>]) and GraphPad Prism 5.01 (GraphPad Software, Inc. [[www.graphpad.com](http://www.graphpad.com)]) were utilized to perform the analyses.

## ACKNOWLEDGMENTS AND FUNDING

This study was funded in part by the National Natural Science Foundation of China, (grant no. 81301747); the Science Technology Department of Zhejiang Province, Social Development Project of Public Welfare Technology (grant no. 2015C33176); the Medical Science Research Foundation of the Health Bureau of Zhejiang Province (grant no. 2013KYB028); and the Zhejiang Provincial Administration of Traditional Chinese Medicine (grant no. 2016ZB018).

## CONFLICTS OF INTEREST

The authors declare that no competing interests exist.

## REFERENCES

1. DeSantis C, Ma J, Bryan L, Jemal A. Breast cancer statistics, 2013. *CA Cancer J Clin.* 2014; 64:52–62.
2. Fan L, StrassER–Weippl K, Li JJ, St Louis J, Finkelstein DM, Yu KD, Chen WQ, Shao ZM, Goss PE. Breast cancer in China. *Lancet Oncol.* 2014; 15:e279–289.
3. Abdel-Fatah TM, Arora A, Moseley PM, Perry C, Rakha EA, Green AR, Chan SY, Ellis IO, Madhusudan S. DNA repair prognostic index modelling reveals an essential role for base excision repair in influencing clinical outcomes in ER negative and triple negative breast cancers. *Oncotarget.* 2015; 6:21964–21978. doi: 10.18632/oncotarget.4157.
4. Tsai KW, Li GC, Chen CH, Yeh MH, Huang JS, Tseng HH, Fu TY, Liou HH, Pan HW, Huang SF, Chen CC, Chang HY, Ger LP, et al. Reduction of global 5-hydroxymethylcytosine is a poor prognostic factor in breast cancer patients,

- especially for an ER/PR-negative subtype. *Breast Cancer Res Treat.* 2015; 153:219–234.
5. Poletini J, Silva MG, Kacarovsky M, Syed TA, Saade GR, Menon R. Screening of lysyl oxidase (LOX) and lysyl oxidase like (LOXL) enzyme expression and activity in preterm prelabor rupture of fetal membranes. *J Perinat Med.* 2016; 44:99–109.
  6. Ruiz LA, Baez-Vega PM, Ruiz A, Peterse DP, Monteiro JB, Bracero N, Beauchamp P, Fazleabas AT, Flores I. Dysregulation of Lysyl Oxidase Expression in Lesions and Endometrium of Women With Endometriosis. *Reprod Sci.* 2015; 22:1496–508.
  7. Cox TR, Rumney RMH, Schoof EM, Perryman L, Hoyer AM, Agrawal A, Bird D, Latif NA, Forrest H, Evans HR, Huggins ID, Lang G, Linding R, et al. The hypoxic cancer secretome induces pre-metastatic bone lesions through lysyl oxidase. *Nature.* 2015; 522:106–110.
  8. Bates AL, Pickup MW, Hallett MA, Dozier EA, Thomas S, Fingleton B. Stromal matrix metalloproteinase 2 regulates collagen expression and promotes the outgrowth of experimental metastases. *J Pathol.* 2015; 235:773–783.
  9. Liu J, Eischeid AN, Chen XM. Col1A1 production and apoptotic resistance in TGF-beta1-induced epithelial-to-mesenchymal transition-like phenotype of 603B cells. *PLoS one.* 2012; 7:e51371.
  10. Tichet M, Prod'Homme V, Fenouille N, Ambrosetti D, Mallavialle A, Cerezo M, Ohanna M, Audebert S, Rocchi S, Giaccherio D, Boukari F, Allegra M, Chambard JC, et al. Tumour-derived SPARC drives vascular permeability and extravasation through endothelial VCAM1 signalling to promote metastasis. *Nat Commun.* 2015; 6:6993.
  11. Livraghi L, Garber JE. PARP inhibitors in the management of breast cancer: current data and future prospects. *BMC Med.* 2015; 13:188.
  12. Chan M, Chang MC, Gonzalez R, Lategan B, Del Barco E, Vera-Badillo F, Quesada P, Goldstein R, Cruz I, Ocana A, Cruz JJ, Amir E. Outcomes of Estrogen Receptor Negative and Progesterone Receptor Positive Breast Cancer. *PLoS one.* 2015; 10:e0132449.
  13. Andreopoulou E, Schweber SJ, Sparano JA, McDaid HM. Therapies for triple negative breast cancer. *Expert Opin Pharmacother.* 2015; 16:983–998.
  14. Lehmann BD, Bauer JA, Chen X, Sanders ME, Chakravarthy AB, Shyr Y, Pietenpol JA. Identification of human triple-negative breast cancer subtypes and preclinical models for selection of targeted therapies. *J Clin Invest.* 2011; 121:2750–2767.
  15. Newcomb PA, Passarelli MN, Phipps AI, Anderson GL, Wactawski-Wende J, Ho GY, O'Sullivan MJ, Chlebowski RT. Oral bisphosphonate use and risk of postmenopausal endometrial cancer. *J Clin Oncol.* 2015; 33:1186–1190.
  16. Addison JB, Koontz C, Fugett JH, Creighton CJ, Chen D, Farrugia MK, Padon RR, Voronkova MA, McLaughlin SL, Livengood RH, Lin CC, Ruppert JM, Pugacheva EN, et al. KAP1 promotes proliferation and metastatic progression of breast cancer cells. *Cancer Res.* 2015; 75:344–355.
  17. Liu Y, Zhu P, Wang Y, Wei Z, Tao L, Zhu Z, Sheng X, Wang S, Ruan J, Liu Z, Cao Y, Shan Y, Sun L, et al. Antimetastatic Therapies of the Polysulfide Diallyl Trisulfide against Triple-Negative Breast Cancer (TNBC) via Suppressing MMP2/9 by Blocking NF-kappaB and ERK/MAPK Signaling Pathways. *PLoS one.* 2015; 10:e0123781.
  18. Nagai MA, Gerhard R, Fregnani JH, Nonogaki S, Rierger RB, Netto MM, Soares FA. Prognostic value of NDRG1 and SPARC protein expression in breast cancer patients. *Breast Cancer Res Treat.* 2011; 126:1–14.
  19. Ichinose Y, Migita K, Nakashima T, Kawakami A, Aoyagi T, Eguchi K. Effects of bisphosphonate on the release of MMP-2 from cultured human osteoblasts. *Tohoku J Exp Med.* 2000; 192:111–118.
  20. Odri G, Kim PP, Lamoureux F, Charrier C, Battaglia S, Amiaud J, Heymann D, Gouin F, Redini F. Zoledronic acid inhibits pulmonary metastasis dissemination in a preclinical model of Ewing's sarcoma via inhibition of cell migration. *BMC Cancer.* 2014; 14:169.
  21. Mann V, Ralston SH. Meta-analysis of COL1A1 Sp1 polymorphism in relation to bone mineral density and osteoporotic fracture. *Bone.* 2003; 32:711–717.
  22. Tang L, Feng J. SPARC in Tumor Pathophysiology and as a Potential Therapeutic Target. *Curr Pharm Des.* 2014; 20:6182–90.
  23. Singh T, Kaur V, Kumar M, Kaur P, Murthy RS, Rawal RK. The critical role of bisphosphonates to target bone cancer metastasis: an overview. *J Drug Target.* 2015; 23:1–15.
  24. Nienhuis HH, Arjaans M, Timmer-Bosscha H, de Vries EG, Schroder CP. Human stromal cells are required for an anti-breast cancer effect of zoledronic acid. *Oncotarget.* 2015; 6:24436–24447. doi: 10.18632/oncotarget.4421.
  25. Hu XC, Zhang J, Xu BH, Cai L, Ragaz J, Wang ZH, Wang BY, Teng YE, Tong ZS, Pan YY, Yin YM, Wu CP, Jiang ZF, et al. Cisplatin plus gemcitabine versus paclitaxel plus gemcitabine as first-line therapy for metastatic triple-negative breast cancer (CBCSG006): a randomised, open-label, multicentre, phase 3 trial. *J Clin Oncol.* 2015; 16:436–446.
  26. O'Shaughnessy J, Osborne C, Pippen JE, Yoffe M, Patt D, Rocha C, Koo IC, Sherman BM, Bradley C. Iniparib plus chemotherapy in metastatic triple-negative breast cancer. *N Engl J Med.* 2011; 364:205–214.
  27. Telli ML, Jensen KC, Vinayak S, Kurian AW, Lipson JA, Flaherty PJ, Timms K, Abkevich V, Schackmann EA, Wapnir IL, Carlson RW, Chang PJ, Sparano JA, et al. Phase II Study of Gemcitabine, Carboplatin, and Iniparib As Neoadjuvant Therapy for Triple-Negative and BRCA1/2 Mutation-Associated Breast Cancer With Assessment of a Tumor-Based Measure of Genomic Instability: PrECOG 0105. *J Clin Oncol.* 2015; 33:1895–1901.
  28. Györfy B, Lanczky A, Eklund AC, Denkert C, Budczies J, Li Q, Szallasi Z. An online survival analysis tool to rapidly assess the effect of 22,277 genes on breast cancer prognosis using microarray data of 1,809 patients. *Breast Cancer Res*



- Treat. 2010; 123:725–731. doi: 710.1007/s10549-10009-10674-10549. Epub 12009 Dec 10518.
29. Davis AP, Wieggers TC, Johnson RJ, Lay JM, Lennon-Hopkins K, Saraceni-Richards C, Sciaky D, Murphy CG, Mattingly CJ. Text mining effectively scores and ranks the literature for improving chemical-gene-disease curation at the comparative toxicogenomics database. PLoS One. 2013; 8:e58201. doi: 58210.51371/journal.pone.0058201. Print 0052013.
  30. Subramanian A, Tamayo P, Mootha VK, Mukherjee S, Ebert BL, Gillette MA, Paulovich A, Pomeroy SL, Golub TR, Lander ES, Mesirov JP. Gene set enrichment analysis: a knowledge-based approach for interpreting genome-wide expression profiles. Proc Natl Acad Sci U S A. 2005; 102:15545–15550.
